# Supplementary material for: Molecular optimization by capturing chemist’s intuition using deep neural networks
Source: PubMed Central journal article supplement (PMC7980633; doi:10.1186/s13321-021-00497-0), 2021-03-20

# Molecular Optimization by Capturing Chemist's Intuition Using Deep Neural Networks

Jiazhen He<sup>1\*</sup>, Huifang You<sup>1,3</sup>, Emil Sandström<sup>1,4</sup>, Eva Nittinger<sup>2</sup>, Esben Jannik Bjerrum<sup>1</sup>, Christian Tyrchan<sup>2</sup>, Werngard Czechtizkyr<sup>2</sup>, Ola Engkvist<sup>1</sup>

<sup>1</sup>Discovery Sciences, R&D, AstraZeneca, Gothenburg, Sweden

<sup>2</sup>Medicinal Chemistry, Research and Early Development, Respiratory and Immunology (R&I), BioPharmaceuticals R&D, AstraZeneca, Gothenburg, Sweden

<sup>3</sup>Department of Pharmaceutical Biosciences, Uppsala University, Uppsala, Sweden

<sup>4</sup>Department of Mathematics and Mathematical Statistics, Umeå University, Umeå, Sweden

\*Correspondence: [jiazhen.he@astrazeneca.com](mailto:jiazhen.he@astrazeneca.com)

## Supplementary material

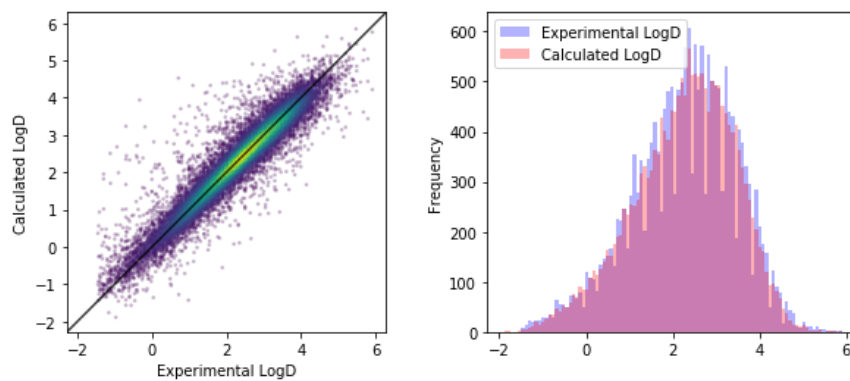

(a) Experimental LogD vs. predicted LogD and their distributions

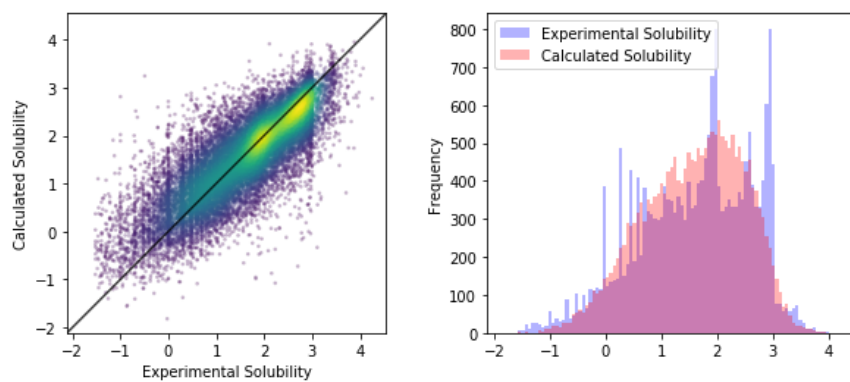

(b) Experimental solubility vs. predicted solubility and their distributions

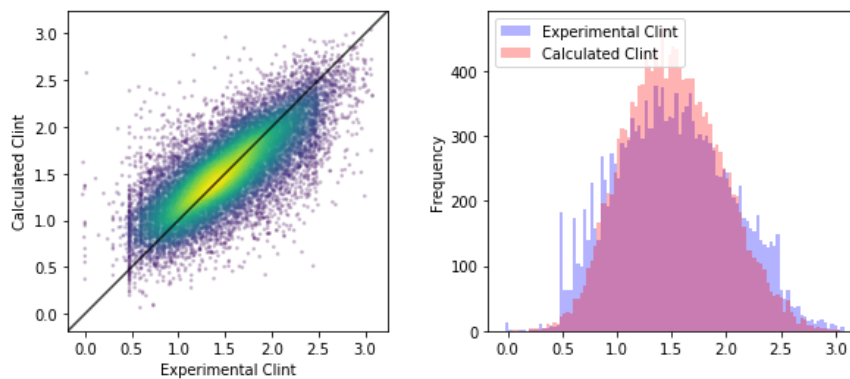

(c) Experimental clint vs. predicted clint and their distributions

**Figure 1** Experimental property values vs. predicted property values and their distributions

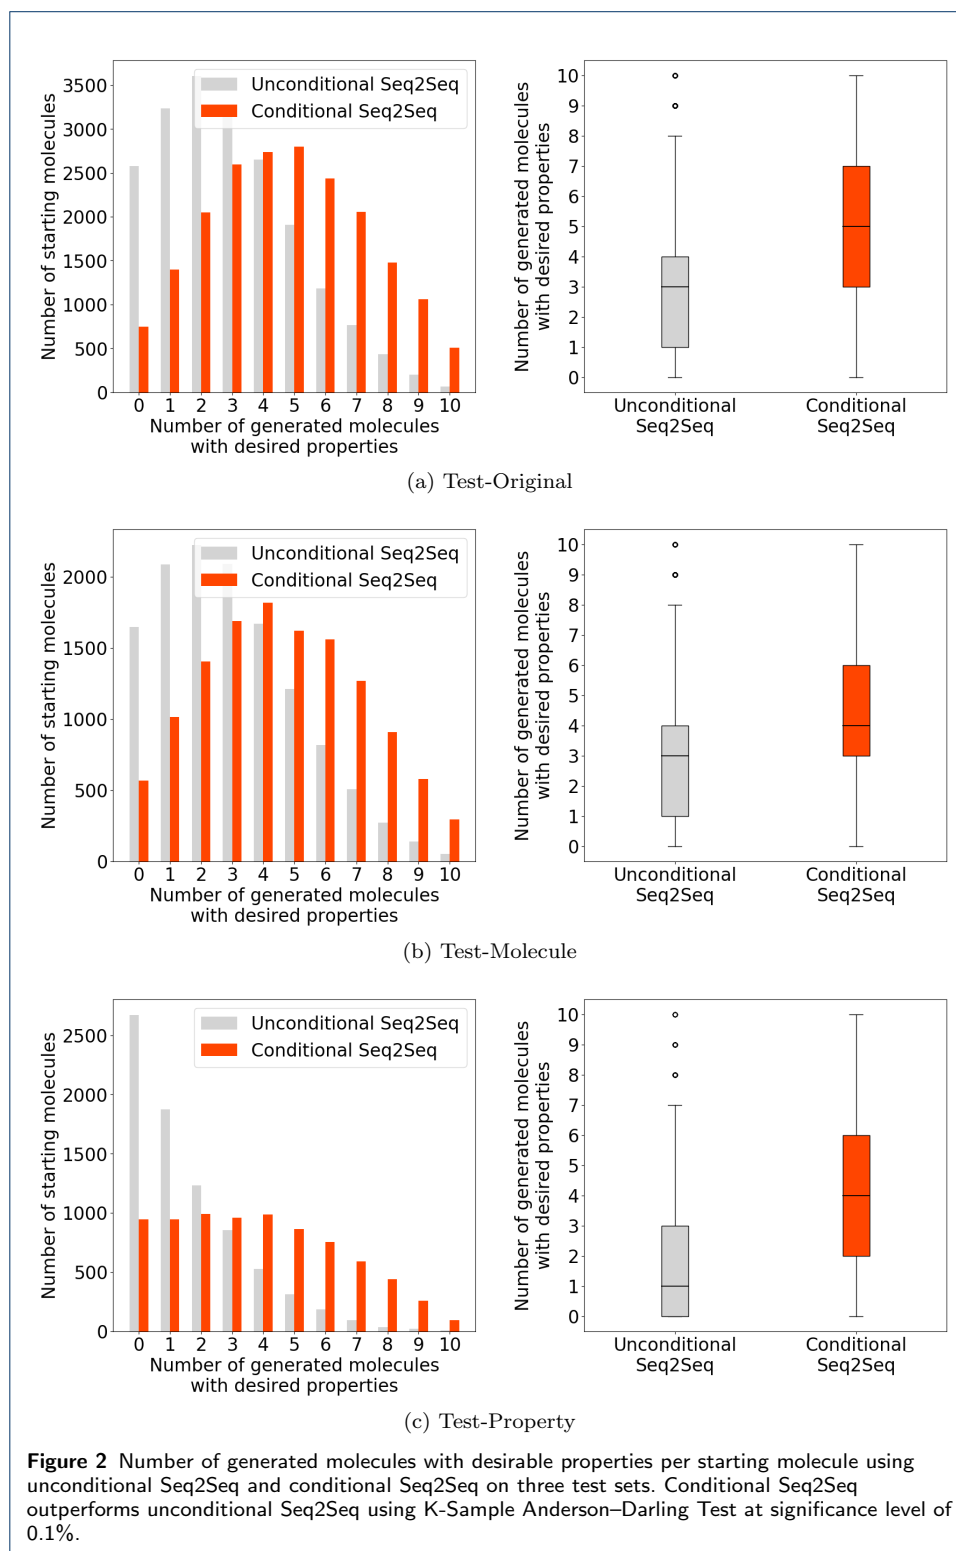

Supplement: 13321_2021_497_MOESM1_ESM.pdf [file 13321_2021_497_MOESM1_ESM.pdf]
